# Supplementary material
Source: PubMed Central journal article supplement (PMC4175977)
Supplement: Supp_Fig1.pdf [file Supp_Fig1.pdf]

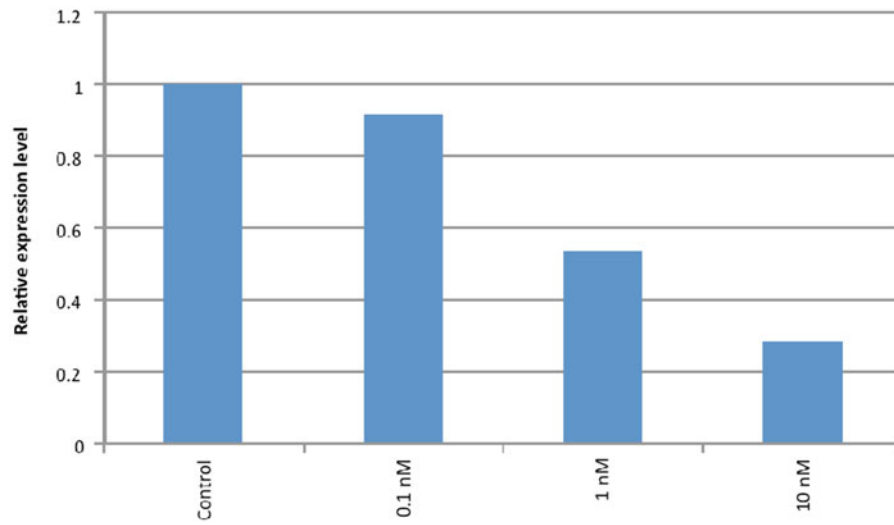

**SUPPLEMENTARY FIG. S1.** *USP9Y-TTY15* expression level measured by qRT-PCR in LNCaP cells treated with mibolerone at 0.1, 1, and 10 nM concentration. Results are presented in N fold change relative to control cells treated with 0.01% ethanol (setting the expression level at 1).
