# Supplementary material
Source: PubMed Central journal article supplement (PMC4175977)
Supplement: Supp_Table1.pdf [file Supp_Table1.pdf]

## Supplementary Data

SUPPLEMENTARY TABLE S1. CLINICOPATHOLOGICAL  
DETAILS OF 105 CHINESE PROSTATE CANCER CASES

| Case NO. | Gleason score | TNM stage | Lymph node metastasis | Age | PSA (ng/mL) |
|----------|---------------|-----------|-----------------------|-----|-------------|
| P1       | 7             | T3bN0M0   | NO                    | 73  | 24.661      |
| P3       | 6             | T2N0M0    | NO                    | 75  | 12.882      |
| P4       | 7             | T3aN0M0   | NO                    | 61  | 23.459      |
| P6       | 7             | T3aN0M0   | NO                    | 54  | 8.809       |
| P7       | 6             | T2N0M0    | NO                    | 69  | 8.007       |
| P9       | 7             | T2N0M0    | NO                    | 75  | 5.337       |
| P10      | 8             | T3bN0M0   | NO                    | 66  | 18.987      |
| P11      | 7             | T2N0M0    | NO                    | 76  | 15.909      |
| P12      | 6             | T2N0M0    | NO                    | 73  | 3.812       |
| P13      | 8             | T3bN0M0   | NO                    | 74  | 45.227      |
| P14      | 9             | T3bN0M0   | NO                    | 55  | 21.853      |
| P15      | 6             | T2N0M0    | NO                    | 68  | 86.212      |
| P16      | 7             | T3aN0M0   | NO                    | 63  | 86.212      |
| P17      | 7             | T2N0M0    | NO                    | 79  | 8.214       |
| P18      | 7             | T3bN0M0   | NO                    | 58  | 8.735       |
| P19      | 7             | T3bN0M0   | NO                    | 57  | 6.558       |
| P20      | 7             | T3bN0M0   | NO                    | 72  | 4.62        |
| P22      | 9             | T2N0M0    | NO                    | 49  | 5.879       |
| P23      | 6             | T2N0M0    | NO                    | 72  | 5.262       |
| P24      | 7             | T3aN0M0   | NO                    | 75  | 9.754       |
| P25      | 7             | T3aN0M0   | NO                    | 62  | 15.6        |
| P26      | 7             | T3aN0M0   | NO                    | 59  | 14.023      |
| P27      | 8             | T2bN0M0   | NO                    | 63  | 7.03        |
| P28      | 8             | T2N0M0    | NO                    | 57  | 18.161      |
| P29      | 6             | T3aN0M0   | NO                    | 70  | 8.565       |
| P30      | 7             | T2N0M0    | NO                    | 65  | 3.036       |
| P31      | 7             | T2aN0M0   | NO                    | 72  | 5.328       |
| P32      | 6             | T2N0M0    | NO                    | 68  | 24.498      |
| P33      | 6             | T2N0M0    | NO                    | 68  | 2.723       |
| P34      | 8             | T3aN0M0   | NO                    | 74  | 12.538      |
| P35      | 7             | T2aN0M0   | NO                    | 57  | 21.166      |
| P36      | 7             | T2aN0M0   | NO                    | 63  | 5.2         |
| P37      | 7             | T3aN1M0   | YES                   | 64  | 1.929       |
| P38      | 7             | T2cN0M0   | NO                    | 58  | 18.305      |
| P40      | 7             | T4N0M0    | NO                    | 64  | 30.642      |
| P41      | 6             | T3aN0M0   | NO                    | 56  | 6.67        |
| P42      | 7             | T2N0M0    | NO                    | 63  | 9.417       |
| P43      | 7             | T3aN0M0   | NO                    | 64  | -           |
| P44      | 6             | T1cN0M0   | NO                    | 73  | 8.786       |
| P45      | 7             | T1cN0M0   | NO                    | 72  | 6.238       |
| P46      | 7             | T3bN0M0   | NO                    | 71  | 56.896      |
| P47      | 7             | T3bN0M0   | NO                    | 71  | 9.453       |
| P48      | 6             | T2cN0M0   | NO                    | 67  | 14.835      |
| P49      | 7             | T2N0M0    | NO                    | 62  | 9.877       |
| P50      | 8             | T3bN0M0   | NO                    | 64  | 35.133      |
| P51      | 8             | T3bN0M0   | NO                    | 62  | 16.779      |
| P53      | 8             | T3aN0M0   | NO                    | 45  | 11.053      |
| P55      | 7             | T3aN0M0   | NO                    | 63  | 19.8        |
| P56      | 7             | T3aN0M0   | NO                    | 65  | 19.263      |
| P57      | 7             | T3aN0M0   | NO                    | 73  | 11.842      |
| P58      | 7             | T2N0M0    | NO                    | 76  | 18.987      |
| P59      | 7             | T2cN0M0   | NO                    | 55  | 103.275     |
| P60      | 8             | T3aN0M0   | NO                    | 59  | 13.746      |
| P62      | 8             | T3aN0M0   | NO                    | 75  | 24.89       |
| P66      | 7             | T3aN0M0   | NO                    | 68  | 32.496      |
| P67      | 9             | T3bN0M0   | NO                    | 74  | 50.117      |

SUPPLEMENTARY TABLE S1. (CONTINUED)

| Case NO. | Gleason score | TNM stage | Lymph node metastasis | Age | PSA (ng/mL) |
|----------|---------------|-----------|-----------------------|-----|-------------|
| P68      | 7             | T3aN0M0   | NO                    | 69  | 18.936      |
| P69      | 7             | T3N0M0    | NO                    | 59  | 33.904      |
| P70      | 6             | T2cN0M0   | NO                    | 67  | 6.529       |
| P71      | 8             | T3aN1M0   | YES                   | 74  | 34.157      |
| P72      | 8             | T3aN0M0   | NO                    | 46  | 33.341      |
| P73      | 8             | T3bN1M0   | YES                   | 73  | 47.026      |
| P74      | 7             | T2N0M0    | NO                    | 67  | 6.931       |
| P75      | 7             | T3aN0M0   | NO                    | 49  | -           |
| P76      | 6             | T3aN0M0   | NO                    | 69  | 23.629      |
| P77      | 8             | T3aNxM0   | NO                    | 74  | 21.694      |
| P78      | 7             | T2N0M0    | NO                    | 61  | 48.404      |
| P79      | 7             | T2N0M0    | NO                    | 76  | 10.244      |
| P80      | 8             | T3bN1M0   | YES                   | 63  | 33.556      |
| P81      | 7             | T3aN0M0   | NO                    | 71  | 17.526      |
| P82      | 7             | T3aN0M0   | NO                    | 57  | 14.808      |
| P83      | 7             | T4N0M0    | NO                    | 67  | 26          |
| P85      | 7             | T3bN0M0   | NO                    | 69  | 44.769      |
| P86      | 9             | T3bN1M0   | YES                   | 68  | 79.262      |
| P87      | 9             | T3bN1M0   | YES                   | 67  | 79.251      |
| P88      | 9             | T3aN0M0   | NO                    | 76  | 15.388      |
| P89      | 7             | T2N0M0    | NO                    | 77  | 23.022      |
| P90      | 7             | T3bN0M0   | NO                    | 70  | 10.68       |
| P92      | 9             | T3bN1M0   | YES                   | 81  | 7.547       |
| P93      | 7             | T2N1M0    | YES                   | 65  | 5.555       |
| P94      | 7             | T2N0M0    | NO                    | 65  | 19.413      |
| P95      | 7             | T3bN0M0   | NO                    | 63  | 9.562       |
| P96      | 6             | T2N0M0    | NO                    | 72  | 15.74       |
| P97      | 7             | T3bN0M0   | NO                    | 62  | 4.694       |
| P98      | 6             | T2N0M0    | NO                    | 71  | 2.738       |
| P99      | 6             | T2N0M0    | NO                    | 68  | 21.12       |
| P100     | 7             | T2N0M0    | NO                    | 73  | 9.716       |
| P101     | 7             | T2N0M0    | NO                    | 56  | 34.41       |
| P102     | 9             | T3bN0M0   | NO                    | 62  | 29.713      |
| P103     | 7             | T3aN0M0   | NO                    | 75  | 25.52       |
| P104     | 7             | T3aN0M0   | NO                    | 57  | 8.847       |
| P106     | 7             | T3aN0M0   | NO                    | 67  | 127.373     |
| P108     | 7             | T2N0M0    | NO                    | 70  | 7.126       |
| P116     | 7             | T3aN0M0   | NO                    | 59  | 8.988       |
| P119     | 9             | T3N1M0    | YES                   | 58  | 20.283      |
| P120     | 8             | T3aN0M0   | NO                    | 63  | 12.379      |
| P121     | 7             | T2N0M0    | NO                    | 63  | 12.254      |
| P124     | 7             | T3bN0M0   | NO                    | 67  | 22.43       |
| P125     | 7             | T3aN0M0   | NO                    | 68  | 0.305       |
| P126     | 7             | T2N0M0    | NO                    | 76  | 13.174      |
| P127     | 7             | T4N0M0    | NO                    | 66  | 23.519      |
| P128     | 6             | T2N0M0    | NO                    | 68  | 13.302      |
| P130     | 7             | T3aN0M0   | NO                    | 60  | 8.299       |
| P131     | 8             | T3bN1M0   | YES                   | 57  | 33.56       |
| P132     | 6             | T2N0M0    | NO                    | 67  | 38          |

Gleason score, a commonly used pathological grading system; PSA, prostate specific antigen; TMN stage, a commonly used system to define tumor clinical stage; -: no data.

(continued)
