# Supplementary material
Source: PubMed Central journal article supplement (PMC4175977)
Supplement: Supp_Table2.pdf [file Supp_Table2.pdf]

SUPPLEMENTARY TABLE S2. QUANTITATIVE RT-PCR PRIMERS USED IN THIS STUDY

| <i>Primers</i>        | <i>Sequence</i>          | <i>The length of the product</i> |
|-----------------------|--------------------------|----------------------------------|
| <i>USP9Y-TTTY15-F</i> | TGTGCTGTGTCAAGTATG       | 202 bp                           |
| <i>USP9Y-TTTY15-R</i> | AGGTCAGAAACCCTGTAC       |                                  |
| <i>SLC45A3-ELK4-F</i> | AACCAGCCTGCACGCGCT       | 154 bp                           |
| <i>SLC45A3-ELK4-R</i> | TGCCCATCATTAGAGGTCCAACAG |                                  |
| <i>GAPDH-F</i>        | AAGGTGAAGGTCCGGAGTCAA    | 108 bp                           |
| <i>GAPDH-R</i>        | AATGAAGGGGTCATTGATGG     |                                  |
